# Supplementary material
Source: PubMed Central journal article supplement (PMC3731202)
Supplement: NIHMS54008-supplement-2.pdf [file NIHMS54008-supplement-2.pdf]

# Protein Destabilisation by Ruthenium(II) Tris-Bipyridine Based Protein-Surface Mimetics

## Supporting Information

Andrew J. Wilson,<sup>\*a,b</sup> James R. Ault,<sup>b,c</sup> Maria H. Filby<sup>a,b</sup> Hazel I. A. Philips<sup>d</sup> Alison E. Ashcroft<sup>b,c</sup> and Nicholas C. Fletcher<sup>d</sup>

<sup>a</sup>*School of Chemistry, University of Leeds, Woodhouse Lane, Leeds LS2 9JT United Kingdom, Fax: +44 (0)113 3436565; Tel: +44 (0)113 3431409; E-mail: [A.J.Wilson@leeds.ac.uk](mailto:A.J.Wilson@leeds.ac.uk)*

<sup>b</sup>*Astbury Centre for Structural Molecular Biology, University of Leeds, Woodhouse Lane, Leeds LS2 9JT, United Kingdom*

<sup>c</sup>*Institute of Molecular and Cellular Biology, University of Leeds, Woodhouse Lane, Leeds LS2 9JT, United Kingdom*

<sup>d</sup>*School of Chemistry and Chemical Engineering, Queens University Belfast, BT9 5 AG, UK*

| <b>Section</b>              | <b>Page</b> |
|-----------------------------|-------------|
| Additional CD Spectra       | 2           |
| Additional Proteolysis Data | 3           |

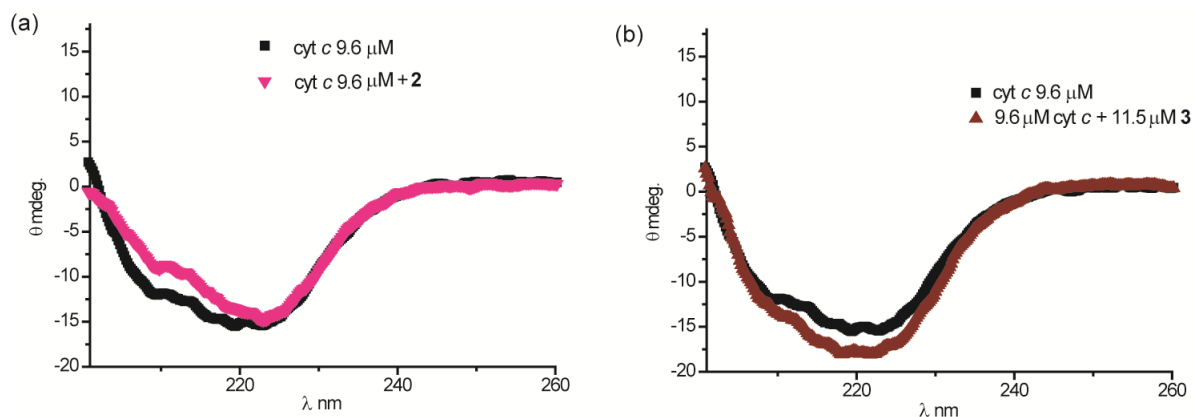

**Figure ESI1.** Perturbations to secondary structure of cyt *c* in the presence of **2** and **3** (5 mM sodium phosphate, pH 7.4) (a) circular dichroism spectra of cyt *c* (9.6  $\mu\text{M}$ ) in the absence and presence of **2** (9.6  $\mu\text{M}$ ) at 25°C (b) circular dichroism spectra of cyt *c* (9.6  $\mu\text{M}$ ) in the absence and presence of **3** (9.6  $\mu\text{M}$ ) at 25°C,

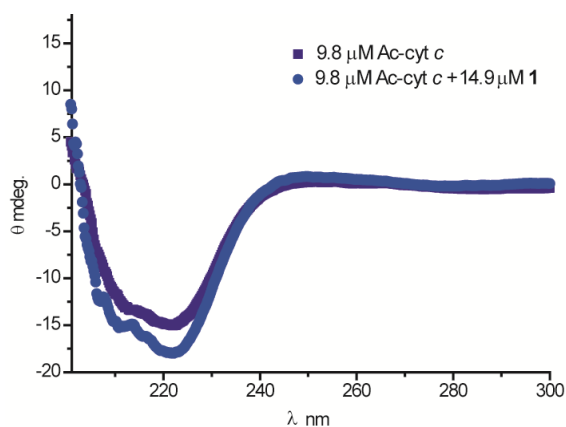

**Figure ESI2.** Perturbations to secondary structure of different proteins in the presence of **1** (5 mM sodium phosphate, pH 7.4); circular dichroism spectra of Ac-cyt *c* (9.8  $\mu\text{M}$ ) in the absence and presence of **1** (14.9  $\mu\text{M}$ ) at 25°C )

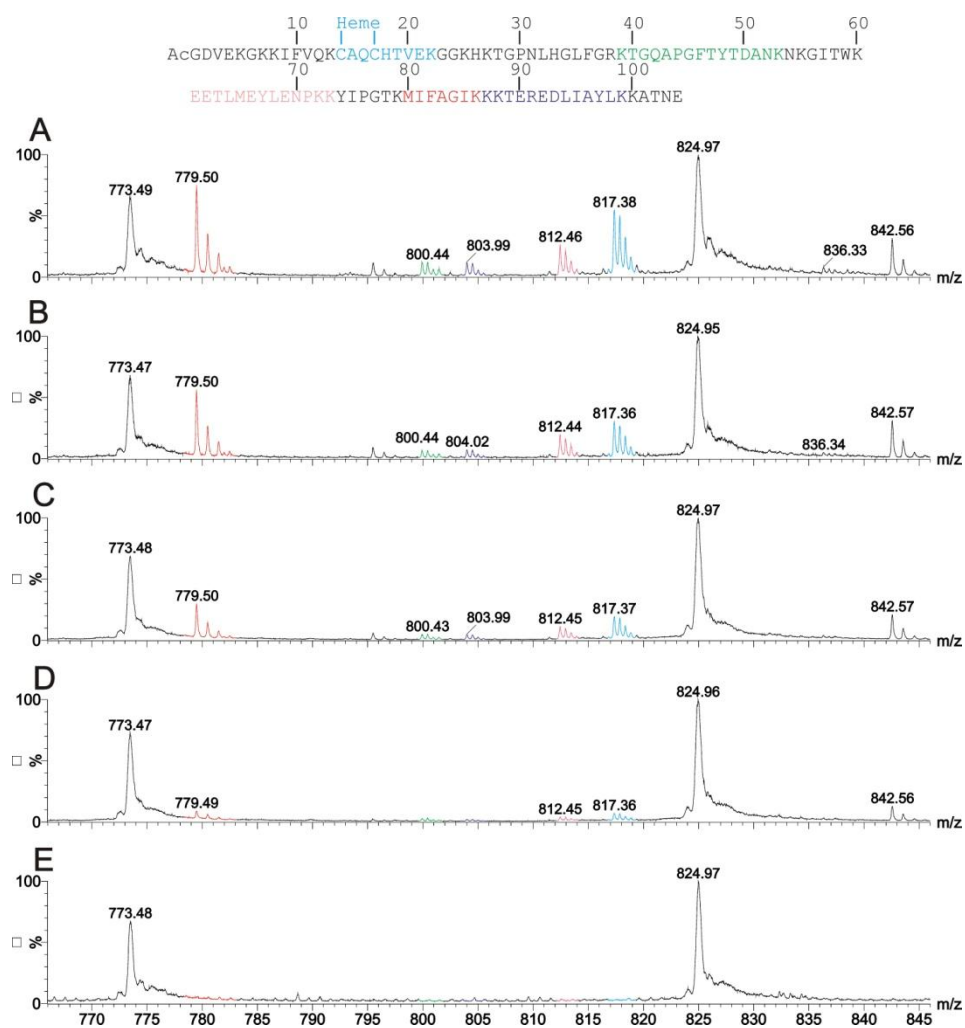

**Figure ESI3.** Electrospray mass spectra ( $m/z$  765-845) of proteolysis samples after 120 min trypsin digestion showing different rates of proteolysis of cytochrome c in the presence of 2 equivalents of receptor (A), 1 equivalent of receptor (B), 0.2 equivalents of receptor (C) and no receptor (D). A control containing no trypsin and no receptor was also analysed (E). Tryptic peptide signals in the MS are colour coded corresponding to their sequence in the protein (top).

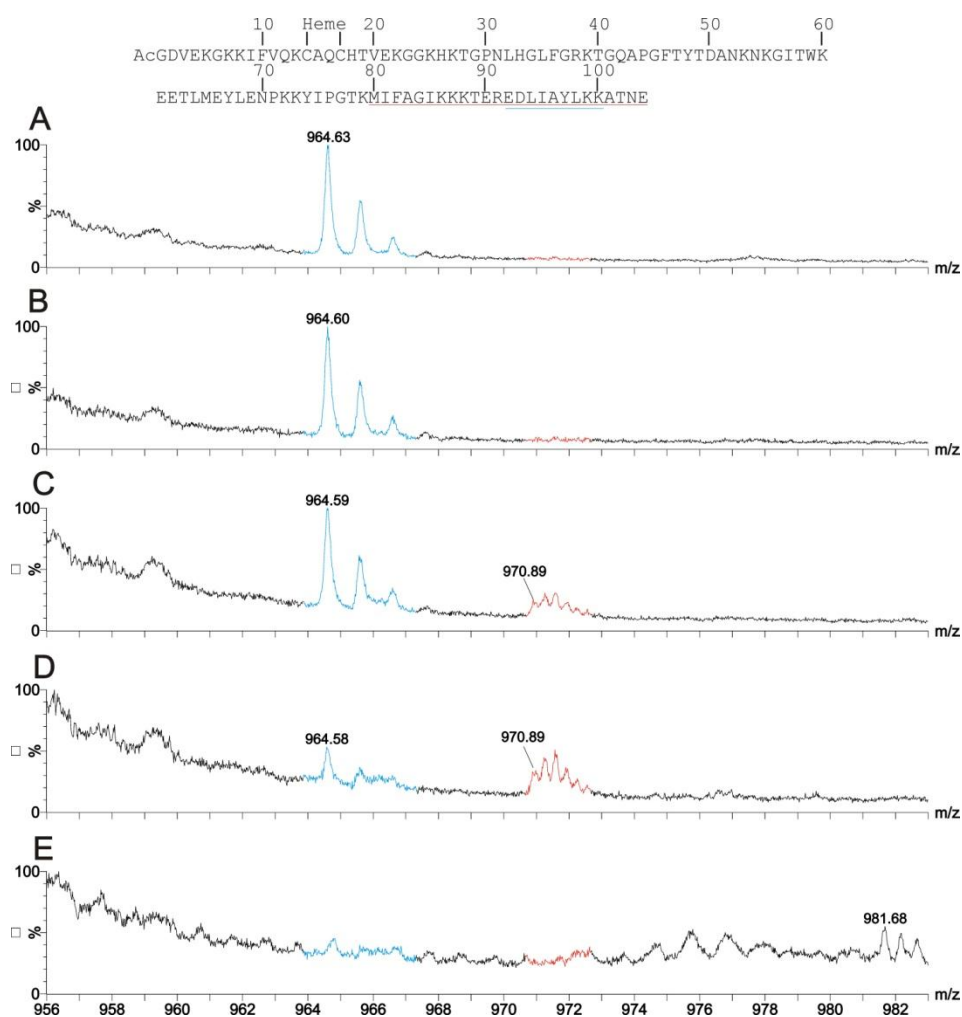

**Figure ESI 4.** Electrospray mass spectra ( $m/z$  956-983) of proteolysis samples after 120 min trypsin digestion showing different rates of proteolysis of cytochrome c in the presence of 2 equivalents of receptor (A), 1 equivalent of receptor (B), 0.2 equivalents of receptor (C) and no receptor (D). A control containing no trypsin and no receptor was also analysed (E). Tryptic peptide signals in the MS are colour coded corresponding to the sequence underlined in the protein (top).
